# Supplementary material
Source: PubMed Central journal article supplement (PMC4889447)
Supplement: NIHMS788442-supplement-Figures.pdf [file NIHMS788442-supplement-Figures.pdf]

**Supplemental Table 1. Primer pairs for plasmid constructs**

| Construct              | Forward primer                             | Reverse primer                               |
|------------------------|--------------------------------------------|----------------------------------------------|
| rs978906A-allele       | 5'-CTAGTGTGGATCCCAGTCGCTCACACTACAATG       | 5'-CGCGTCATTGTAGTGTGAGCGACTGACCATTGTAG       |
|                        | GTCAGTCGCTCACACTACAATGGTCAGTCGCTCA         | TGTGAGCGACTGACCATTGTAGTGTGAGCGACTGGG         |
|                        | CACTACAATGA-3'                             | ATCCACA-3'                                   |
| rs978906G-allele       | 5'-CTAGTGTGGATCCCAGTCGCTCACACTACAGTG       | 5'-CGCGTCACTGTAGTGTGAGCGACTGACCACTGTA        |
|                        | GTCAGTCGCTCACACTACAGTGGTCAGTCGCTCA         | GTGTGAGCGACTGACCACTGTAGTGTGAGCGACTG          |
|                        | CACTACAGTGA-3'                             | GGATCCACA-3'                                 |
| <u>rs978906 mutant</u> | <u>5'-CTAGTGTGGATCCCAGTCGCTCACACGCACCG</u> | <u>5'-CGCGTTCGGTGCGTGTGAGCGACTGACTCGGTGC</u> |
|                        | <u>AGTCAGTCGCTCACACGCACCGAGTCAGTCGCTC</u>  | <u>GTGTGAGCGACTGACTCGGTGCGTGTGAGCGACTG</u>   |
|                        | <u>ACACGCACCGAA-3'</u>                     | <u>GGATCCACA-3'</u>                          |



**Supplemental Table 2. The association between ROCK2 SNPs and stiffness parameters in the screening data (mean  $\pm$  SD)**

| SNPs                  | Adj Ep           | Adj $\beta$   | Adj PWV       | SNPs           | Adj Ep           | Adj $\beta$   | Adj PWV       |
|-----------------------|------------------|---------------|---------------|----------------|------------------|---------------|---------------|
| rs9808232 (Thr431Asn) |                  |               |               | rs4669700      |                  |               |               |
| CC (N = 305)          | 105.2 $\pm$ 31.7 | 8.0 $\pm$ 2.4 | 6.1 $\pm$ 0.9 | CC (N = 256)   | 105.1 $\pm$ 32.2 | 8.1 $\pm$ 2.4 | 6.1 $\pm$ 0.9 |
| AC (N = 393)          | 103.0 $\pm$ 30.8 | 7.8 $\pm$ 2.2 | 6.1 $\pm$ 0.9 | CT (N = 413)   | 102.9 $\pm$ 30.2 | 7.8 $\pm$ 2.1 | 6.1 $\pm$ 0.8 |
| AA (N = 141)          | 98.1 $\pm$ 27.4  | 7.6 $\pm$ 2.0 | 6.0 $\pm$ 0.8 | TT (N = 171)   | 98.8 $\pm$ 29.6  | 7.7 $\pm$ 2.1 | 6.0 $\pm$ 0.9 |
| Additive model        | p = 0.027        | p = 0.046     | p = 0.037     | Additive model | p = 0.042        | p = 0.064     | p = 0.060     |
| rs978906              |                  |               |               | rs12479227     |                  |               |               |
| AA (N = 307)          | 105.1 $\pm$ 31.6 | 8.0 $\pm$ 2.4 | 6.1 $\pm$ 0.9 | CC (N = 623)   | 102.5 $\pm$ 31.5 | 7.9 $\pm$ 2.3 | 6.1 $\pm$ 0.9 |
| AG (N = 390)          | 102.4 $\pm$ 30.5 | 7.8 $\pm$ 2.1 | 6.1 $\pm$ 0.8 | CT (N = 203)   | 103.1 $\pm$ 28.6 | 7.9 $\pm$ 2.1 | 6.1 $\pm$ 0.8 |
| GG (N = 144)          | 98.5 $\pm$ 27.2  | 7.6 $\pm$ 2.0 | 6.0 $\pm$ 0.8 | TT (N = 16)    | 103.7 $\pm$ 29.8 | 8.0 $\pm$ 2.5 | 6.1 $\pm$ 0.8 |

|                |              |           |           |                |              |           |           |
|----------------|--------------|-----------|-----------|----------------|--------------|-----------|-----------|
| Additive model | p = 0.031    | p = 0.063 | p = 0.038 | Additive model | p = 0.798    | p = 0.836 | p = 0.698 |
| rs10167277     |              |           |           | rs1515223      |              |           |           |
| AA (N = 265)   | 105.6 ± 32.0 | 8.1 ± 2.4 | 6.2 ± 0.9 | CC (N = 719)   | 102.5 ± 30.2 | 7.8 ± 2.2 | 6.1 ± 0.8 |
| AT (N = 406)   | 102.7 ± 30.1 | 7.8 ± 2.1 | 6.1 ± 0.8 | CT (N = 122)   | 105.1 ± 32.0 | 8.1 ± 2.5 | 6.1 ± 0.9 |
| TT (N = 164)   | 99.3 ± 29.7  | 7.7 ± 2.2 | 6.0 ± 0.9 | TT (N = 4)     | 117.3 ± 40.0 | 8.7 ± 2.7 | 6.5 ± 1.1 |
| Additive model | p = 0.041    | p = 0.056 | p = 0.062 | Additive model | p = 0.254    | p = 0.215 | p = 0.321 |
| rs10168084     |              |           |           |                |              |           |           |
| TT (N = 308)   | 105.2 ± 31.6 | 8.0 ± 2.3 | 6.1 ± 0.9 |                |              |           |           |
| TC (N = 384)   | 102.9 ± 30.9 | 7.8 ± 2.2 | 6.1 ± 0.9 |                |              |           |           |
| CC (N = 135)   | 98.7 ± 28.1  | 7.7 ± 2.1 | 6.0 ± 0.8 |                |              |           |           |
| Additive model | p = 0.045    | p = 0.087 | p = 0.064 |                |              |           |           |

Adjusted  $E_p$ ,  $\beta$ , and PWV were average values of the raw data pulse the residuals in the multivariate regression model. Covariates in the multivariate regression model included age, sex, diabetes, hypertension, hypercholesterolemia, smoking and body mass index (BMI).

**Supplemental Table 3. Relationship between cardiovascular risk factors and leukocyte ROCK activity (N = 52)**

| Risk factors | Pearson correlation coefficient ( $\gamma$ ) |  | p value  |
|--------------|----------------------------------------------|--|----------|
| age          | -0.23                                        |  | p = 0.10 |
| Ep           | -0.21                                        |  | p = 0.15 |
| beta         | -0.24                                        |  | p = 0.86 |
| PWV          | -0.22                                        |  | p = 0.12 |

  

|              | Leukocyte ROCK activity (mean $\pm$ SD) |                  |          |
|--------------|-----------------------------------------|------------------|----------|
|              | Absence                                 | Presence         | p value  |
| Male         | 163.3 $\pm$ 132.0                       | 135.2 $\pm$ 98.9 | p = 0.41 |
| Hypertension | 163.2 $\pm$ 127.3                       | 116.9 $\pm$ 74.7 | p = 0.28 |
| Diabetes     | 153.5 $\pm$ 119.1                       | 46.0 (N=1)       | p = 0.38 |

|                         |               |               |          |
|-------------------------|---------------|---------------|----------|
| Hyperlipidemia          | 154.2 ± 119.3 | 142.9 ± 122.0 | p = 0.77 |
| Ever and current smoker | 149.8 ± 125.4 | 160.0 ± 78.7  | p = 0.83 |

---

**Supplemental Fig 1. The linkage disequilibrium (LD) plots for the seven tagging SNPs.**

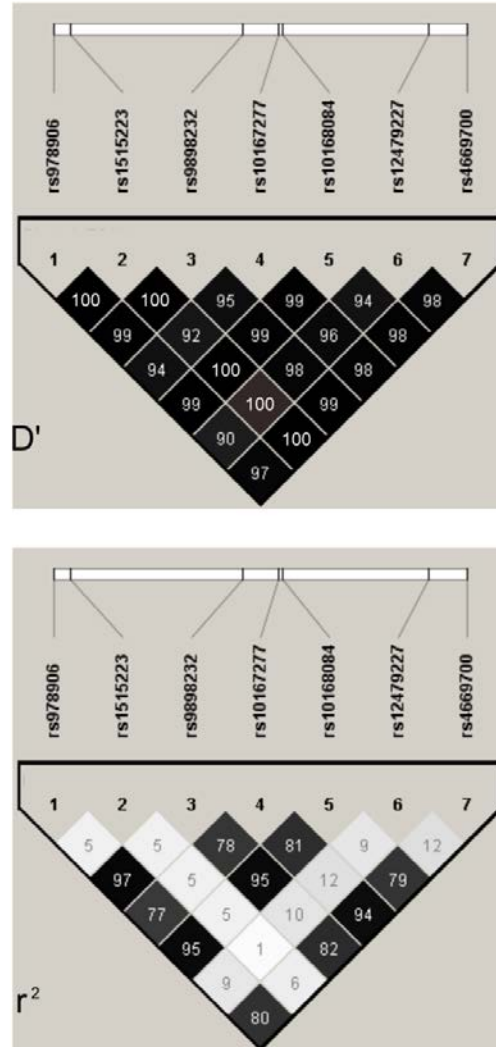

The upper plot shows the  $D'$  and the lower plot  $r^2$  (%) between any pair of SNPs. The dark gray cells in the upper plot indicate strong LD and log of odds (LOD) of 2 or greater. In the lower panel, the color spectrum indicates pairwise  $r^2$  value ranging from black ( $r^2=100\%$ ) to white ( $r^2=0\%$ ).
